RETRACTION

# Retraction: The influence of transgenic (*Bt*) and non-transgenic (non-*Bt*) cotton mulches on weed dynamics, soil properties and productivity of different winter crops

The *PLOS ONE* Editors

The *PLOS ONE* Editors retract this article [1] because it was identified as one of a series of submissions for which we have concerns about authorship, competing interests, and peer review. We regret that the issues were not addressed prior to the article's publication.

All authors either did not reply directly or could not be reached.

## Reference

1. Riaz Maral MW, Khan MB, Ahmad F, Farooq S, Hussain M (2020) The influence of transgenic (*Bt*) and non-transgenic (non-*Bt*) cotton mulches on weed dynamics, soil properties and productivity of different winter crops. *PLoS ONE* 15(9): e0238716. <https://doi.org/10.1371/journal.pone.0238716>

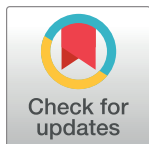

## OPEN ACCESS

**Citation:** The *PLOS ONE* Editors (2022) Retraction: The influence of transgenic (*Bt*) and non-transgenic (non-*Bt*) cotton mulches on weed dynamics, soil properties and productivity of different winter crops. *PLoS ONE* 17(11): e0277579. <https://doi.org/10.1371/journal.pone.0277579>

**Published:** November 16, 2022

**Copyright:** © 2022 The *PLOS ONE* Editors. This is an open access article distributed under the terms of the [Creative Commons Attribution License](https://creativecommons.org/licenses/by/4.0/), which permits unrestricted use, distribution, and reproduction in any medium, provided the original author and source are credited.
